# Supplementary material
Source: publisher figshare collection journal article supplement (https://sage.figshare.com/ndownloader/files/28192333)
Supplement: Supplementary file 1 [file 28192333]

## Sheet: Sheet1
	Supplementary 1. Study population's self-reported diseases, which were diagnosed by a doctor. Data obtained from postal questionnaires at the ages of 31 and 46 years.
	Endocrinological diseases	Genital, urinary and bowel diseases
	Diabetes	Gastrointestinal diseases
	Type 1 Diabetes	Gastric or duodenal ulcer
	Type 2 Diabetes	Gallstones, cholecystitis
	Metabolic syndrome	Urethritis
	Thyroid diseases	Chronic urethritis, nephritis
	Hypothyroidism	Ovary infection
	Hyperthyroidism	Prostatitis
		Sexually transmitted diseases
	Nervous system diseases	Chlamydia
	Organ of hearing diseases	Condyloma
	Ophthalmopathy or eye injury	Genital herpes
	Elevated intraocular pressure	Other genital infection
	Glaucoma
	Cataract	Mental diseases
	Retinal dystrophy	Psychosis
	Functional low vision	Depression
	Strabismus	Other mental disorder
	Diabetic retina disease	Psychoactive drug problem
	Iritis	Drinking problem
	Other infection in eye	Other psychoactive drug problem
	Nervous system disease
	Epilepsy	Other diseases and health conditions
	Migraine headache	Cancer
	Cerebrovascular accident	Skin cancer
	Other disease of nervous system	Other cancer
		Anaemia
	Musculoskeletal diseases	Respiratory diseases
	Rheumatoid arthritis or other arthritis	Asthma
	Fibromyalgia	Emphysema
	Rheumatoid arthritis	Bronchitis
	Psoriatic arthritis	Atopy
	Reactive arthritis	Atopic dermatitis
	Arthritis rheumatoides juvenilis	Milk crust
	Spondylarthritis ancylopoetica	Atopic excema
	Gout	Bone fractures
	Other arthritis
	Other rheumatoid or autoimmune disease	Cardiovascular diseases
	Degenerative back disease or other back diseases	Heart diseases
		Congenital heart disease
		Heart failure
		Coronary heart disease or angina pectoris
		Hypertension
